# Supplementary material for: Phenotypic Characterization of a Genetically Diverse Panel of Mice for Behavioral Despair and Anxiety
Source: PLoS One. 2010 Dec 29;5(12):e14458. doi: 10.1371/journal.pone.0014458 (PMC3012073; doi:10.1371/journal.pone.0014458)
Supplement: Table S1 — Strains phenotyped for behavioral and physiological characteristics - Average body weight and baseline corticosterone levels (µg/dl) are provided. (0.02 MB XLS) [file pone.0014458.s001.xls]

## Sheet: Sheet1
Supplemental Table 1. Strain weight and baseline corticosterone levels
Strain	Weight (g)	Baseline corticosterone (ug/dl)	Corticosterone SD	n (for corticosterone)
129S1/SvImJ	23.4	4.85	5.25	6
A/J	24.2	2.89	3.33	5
AKR/J	28.9	3.30625	3.04266	8
BALB/cJ	25.4	1.79	1.50534	13
BTBR T+ tf/J	30.2	3.834	2.74878	5
BUB/BnJ	29.4	1.002	1.0567	5
C3H/HeJ	24.7	2.4	2.94522	5
C57BL/6J	24.1	2.75333	2.01806	9
C57BLKS/J	23.2	1.76875	1.12403	8
C57BR/J	25.8	NA	NA	NA
C58/J	21.8	1.008	0.709873	5
CBA/J	26.4	2.09444	1.89015	9
CE/J	30.9	2.755	3.67038	6
DBA/2J	25.9	0.85125	0.667135	8
FVB/NJ	27.8	4.14833	3.31262	6
I/LnJ	24.2	0.603333	0.10504	3
LG/J	44.2	1.22333	0.611316	6
LP/J	20.2	4.08333	2.51054	6
MA/MyJ	24.4	2.4975	2.65285	4
MRL/MpJ	38.8	3.35167	2.91686	6
NOD/LtJ	25.8	1.35333	1.41658	6
NOR/LtJ	26.2	3.094	2.56072	5
NZB/B1NJ	27.5	0.81	0.693181	5
NZO/HLLTJ	44.4	NA	NA	NA
NZW/LacJ	31	0.63	0.233024	5
P/J	24.5	NA	NA	NA
PERA/EiJ	24.5	9.65	NA	NA
PL/J	22.3	3.32	2.64045	5
PWK/PhJ	17.4	NA	NA	NA
RIIIS/J	21.8	1.52	1.37935	5
SJL/J	22.9	1.345	1.00433	6
SM/J	19.7	3.464	3.83745	5
SWR/J	21.4	1.49	1.39102	9
