# Supplementary material for: Phenotypic Characterization of a Genetically Diverse Panel of Mice for Behavioral Despair and Anxiety
Source: PLoS One. 2010 Dec 29;5(12):e14458. doi: 10.1371/journal.pone.0014458 (PMC3012073; doi:10.1371/journal.pone.0014458)
Supplement: Table S2 — Average results for TST immobility, OF center time, and OF distance traveled - Complete data are available under the file Pletcher1 in the Mouse Phenome Database. (0.03 MB XLS) [file pone.0014458.s002.xls]

## Sheet: Sheet1
Supplemental Table 2. Average results of inbred strain phenotyping
TST Immobility							Open Field - Center Time							Open Field - Distance Traveled (cm)
Strain	% Immob	SD	SE	n			Strain	%Center	SD	SE	n			Strain	Distance	SD	SE	n
129S1/SvImJ	34.1	0.14	0.02087	46			129S1/SvImJ	0.526882	0.0143249	0.00827049	31			129S1/SvImJ	368.053	346.709	63.3002	31
A/J	34	0.1	0.0156174	42			A/J	0.264646	0.00866504	0.00153178	33			A/J	326.424	489.73	86.5729	33
AKR/J	55.3	0.09	0.018	26			AKR/J	12.4808	0.0644262	0.0128852	26			AKR/J	1922.23	423.552	84.7103	26
BALB/cJ	32.1	0.17	0.0256285	45			BALB/cJ	4.79826	0.0663581	0.00957796	49			BALB/cJ	1235.84	842.967	121.672	49
BTBR T+ tf/J	10.7	0.1	0.02	26			BTBR T+ tf/J	7.87821	0.0440569	0.00881139	26			BTBR T+ tf/J	1716.02	533.799	106.76	26
BUB/BnJ	42.6	0.09	0.0212132	19			BUB/BnJ	16.1481	0.0579973	0.0140664	18			BUB/BnJ	1515.69	354.77	86.0444	18
C3H/HeJ	25.6	0.12	0.024	26			C3H/HeJ	10.5064	0.0483494	0.00966988	26			C3H/HeJ	1102.17	231.929	46.3858	26
C57BL/6J	56	0.13	0.026	26			C57BL/6J	10.8762	0.0549336	0.00942104	35			C57BL/6J	1313.16	327.628	56.1877	35
C57BLKS/J	34.1	0.12	0.0235339	27			C57BLKS/J	9.15333	0.0457345	0.00933552	25			C57BLKS/J	946.744	273.05	55.7362	25
C57BR/J	29.5	0.17	0.0438938	16			C57BR/J	32.1667	0.101784	0.0272028	15			C57BR/J	2134.34	425.476	113.713	15
C58/J	25.4	0.11	0.0229366	24			C58/J	15.6474	0.0874914	0.0174983	26			C58/J	2197.64	983.785	196.757	26
CBA/J	34.9	0.1	0.0179605	32			CBA/J	11.0889	0.0563628	0.0104663	30			CBA/J	1053.07	321.691	59.7364	30
CE/J	27.4	0.15	0.0344124	20			CE/J	13.8571	0.0607094	0.013575	21			CE/J	1627.22	362.129	80.9745	21
DBA/2J	16	0.1	0.0129099	61			DBA/2J	4.64236	0.0426071	0.00621488	48			DBA/2J	1063.2	397.171	57.9333	48
FVB/NJ	13.2	0.1	0.0182574	31			FVB/NJ	18.1562	0.0452709	0.00813089	32			FVB/NJ	2084.13	383.123	68.811	32
I/LnJ	55.3	0.12	0.03	17			I/LnJ	8.74242	0.0409792	0.00894239	22			I/LnJ	2110.59	488.854	106.677	22
LG/J	6.9	0.08	0.0188562	19			LG/J	12.8939	0.0788702	0.0172109	22			LG/J	1715.64	300.865	65.6542	22
LP/J	53.5	0.11	0.0305085	14			LP/J	3.37719	0.0365649	0.00861842	19			LP/J	921.937	446.818	102.507	20
MA/MyJ	29.2	0.16	0.0413118	16			MA/MyJ	29.2194	0.163693	0.0422655	16			MA/MyJ	2356.28	431.824	101.782	19
MRL/MpJ	10.6	0.07	0.0160591	20			MRL/MpJ	15.553	0.0763527	0.0166615	22			MRL/MpJ	1444.6	270.728	59.0778	22
NOD/LtJ	45	0.09	0.0176505	27			NOD/LtJ	25.7679	0.0862506	0.0165989	28			NOD/LtJ	2741.54	698.814	134.487	28
NOR/LtJ	30.8	0.13	0.0306413	19			NOR/LtJ	20.2372	0.101158	0.0202316	26			NOR/LtJ	2516.89	615.639	123.128	26
NZB/B1NJ	49	0.14	0.0305505	22			NZB/B1NJ	2.98667	0.0351746	0.00717998	25			NZB/B1NJ	910.126	400.429	81.7373	25
NZO/HLLTJ	8.9	0.07	0.0247487	9			NZO/HLLTJ	3.15	0.025873	0.00862434	10			NZO/HLLTJ	689.825	172.215	57.4049	10
NZW/LacJ	38.4	0.15	0.0363803	18			NZW/LacJ	12.8333	0.0501184	0.0129405	16			NZW/LacJ	1161.2	275.518	71.1385	16
P/J	36.2	0.14	0.052915	8			P/J	19.1111	0.101581	0.0359144	9			P/J	1807.26	169.332	59.868	9
PL/J	52.5	0.11	0.0234521	23			PL/J	10.7464	0.0323095	0.00688842	23			PL/J	2179.23	2436.41	519.445	23
RIIIS/J	6.7	0.07	0.014	26			RIIIS/J	12.3457	0.0333299	0.00653653	27			RIIIS/J	2106.19	408.818	80.1758	27
SJL/J	39.7	0.11	0.0245967	21			SJL/J	9.21429	0.0962753	0.0215278	21			SJL/J	1011.07	308.495	68.9816	21
SM/J	59.6	0.11	0.0245967	21			SM/J	12.2933	0.0429855	0.00877437	25			SM/J	2159.36	356.536	72.7776	25
SWR/J	20.1	0.11	0.0194454	33			SWR/J	14.5893	0.0356032	0.00685184	28			SWR/J	1443.81	315.029	60.6274	28
PWK/PhJ	No TST data (all climbed tail)						PWK/PhJ	6.72727	0.029658	0.00937868	11			PWK/PhJ	1895.53	465.429	147.181	11
PERA/EiJ	No TST data (all climbed tail)						PERA/EiJ	10.0556	0.0959668	0.0429177	6			PERA/EiJ	1220.99	286.505	128.129	6
